# Supplementary material
Source: PubMed Central journal article supplement (PMC5347622)
Supplement: pnas.1701474114.sapp.pdf [file pnas.1701474114.sapp.pdf]

# Supporting Information

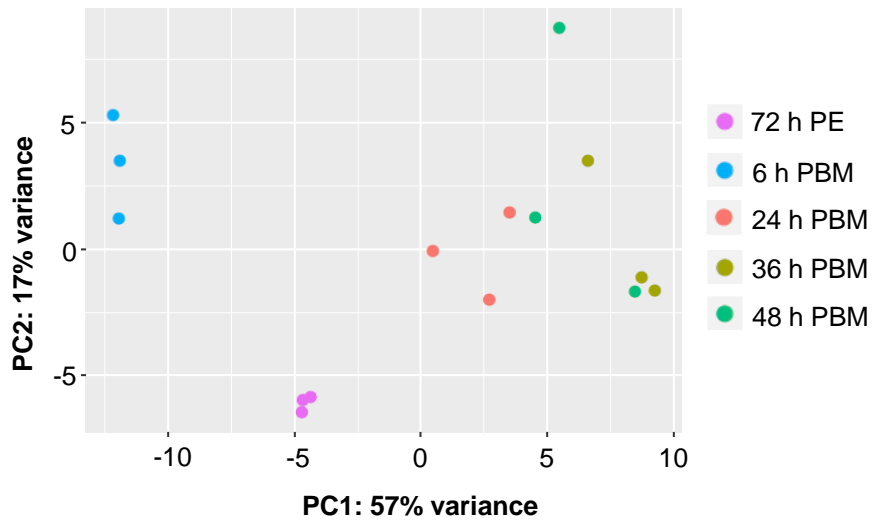

**Fig. S1.** Principle component analysis (PCA) of three biological replicates of small RNA libraries (DESeq2 package).

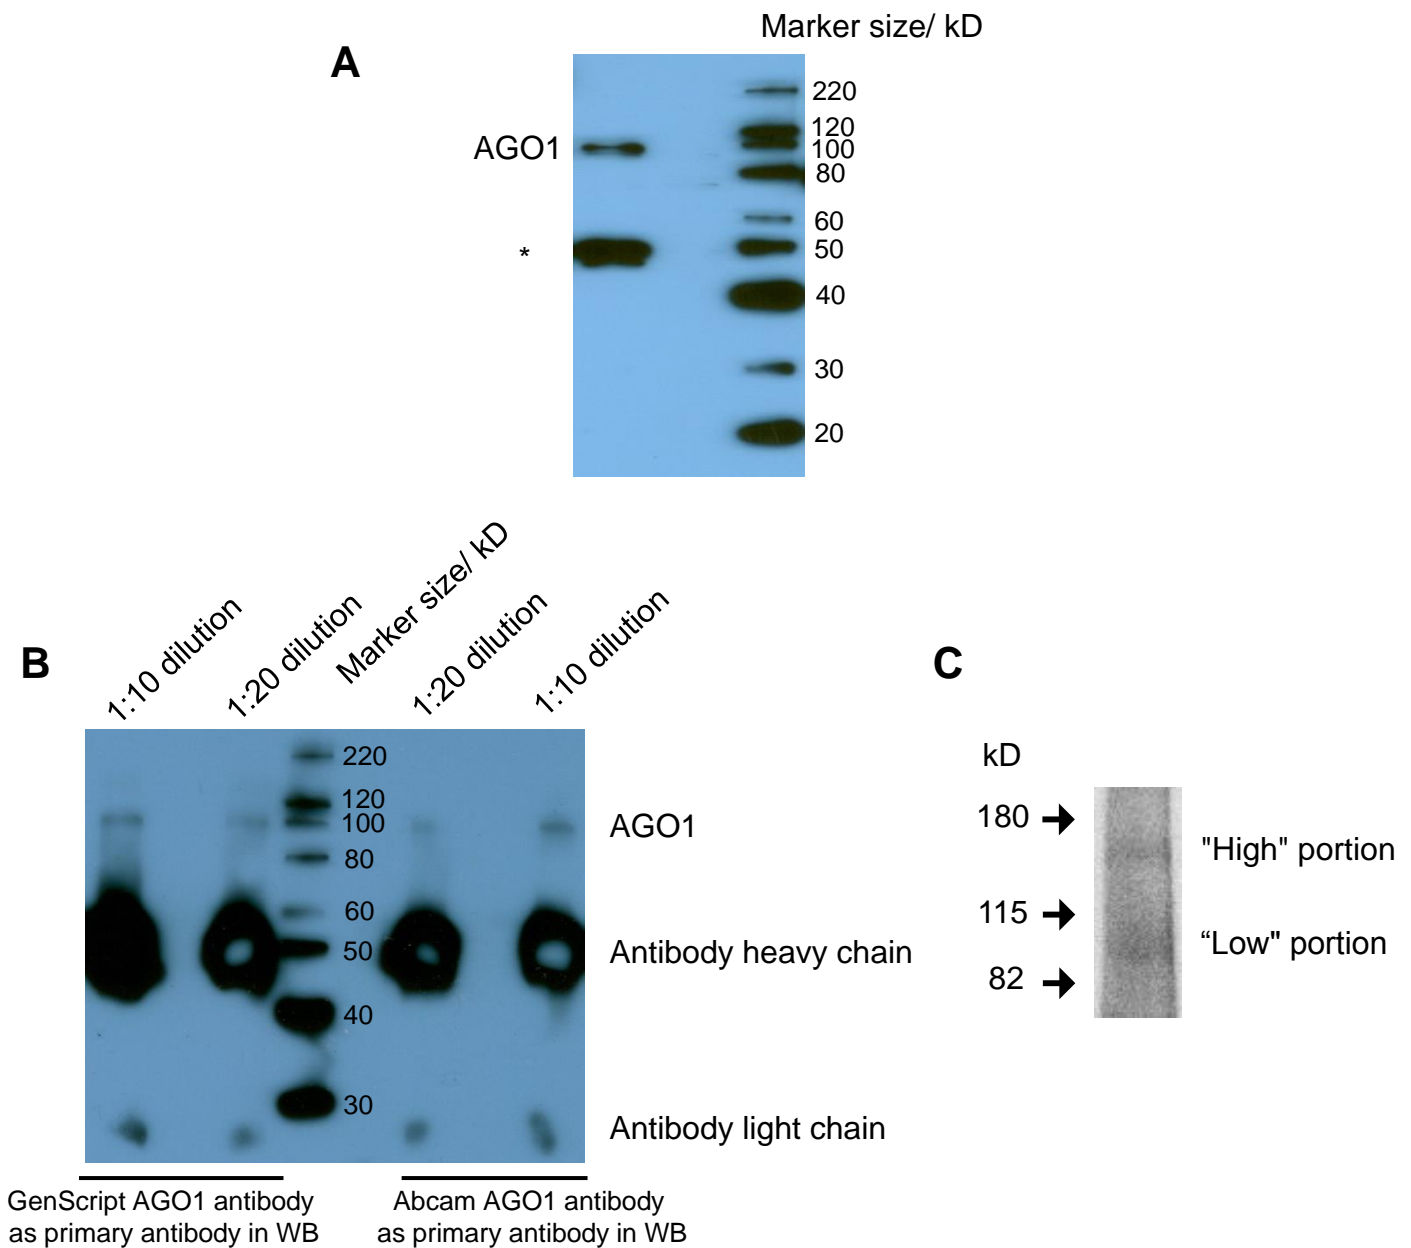

**Fig. S2.** Examination of AGO1 antibody specificity. (A) AGO1 detection in fat body lysates with the *Drosophila* antibody Abcam ab5070 in western blot (\*, non-specific band). (B) AGO1 immunoprecipitation using the GenScript AGO1 antibody. Diluted elution was probed by either the GenScript AGO1 antibody or the Abcam ab5070 antibody in western blot. (C) AGO1-RNA complexes in "High" and "Low" portions during CLIP-seq library preparation.

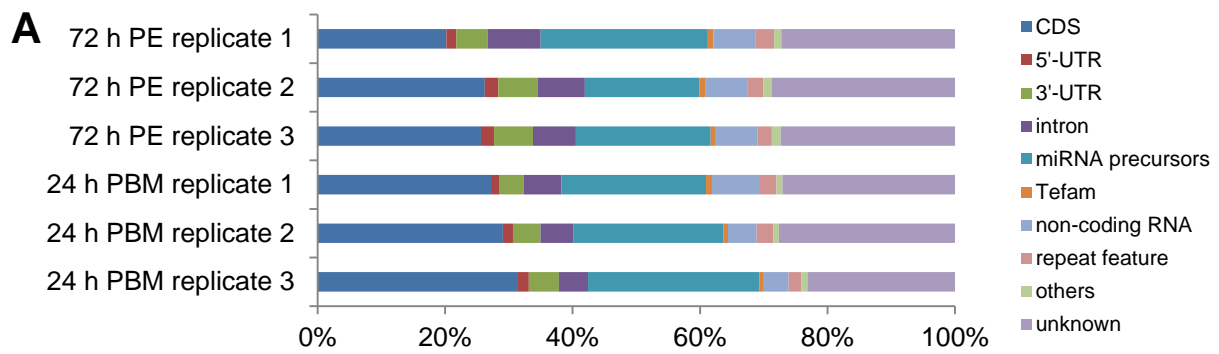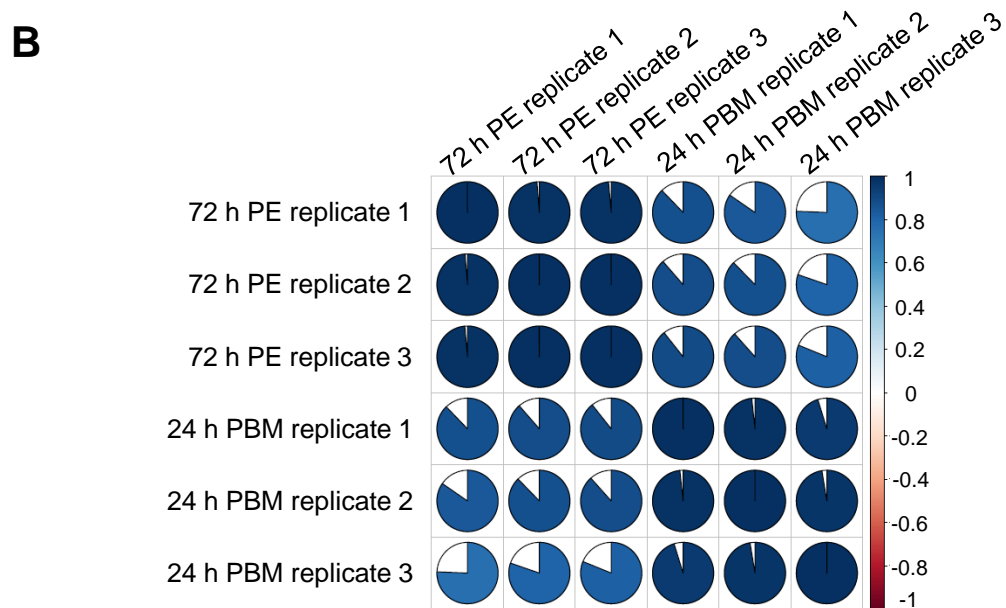

**Fig. S3.** Overall statistics of AGO1 CLIP-seq library. (A) mapping statistics for different annotation categories in AGO1 CLIP-seq libraries; non-coding RNA includes rRNA, tRNA, snRNA and snoRNA. (B) sample-wise pearson correlations of AGO1 CLIP-seq libraries based on normalized counts of mature miRNAs.

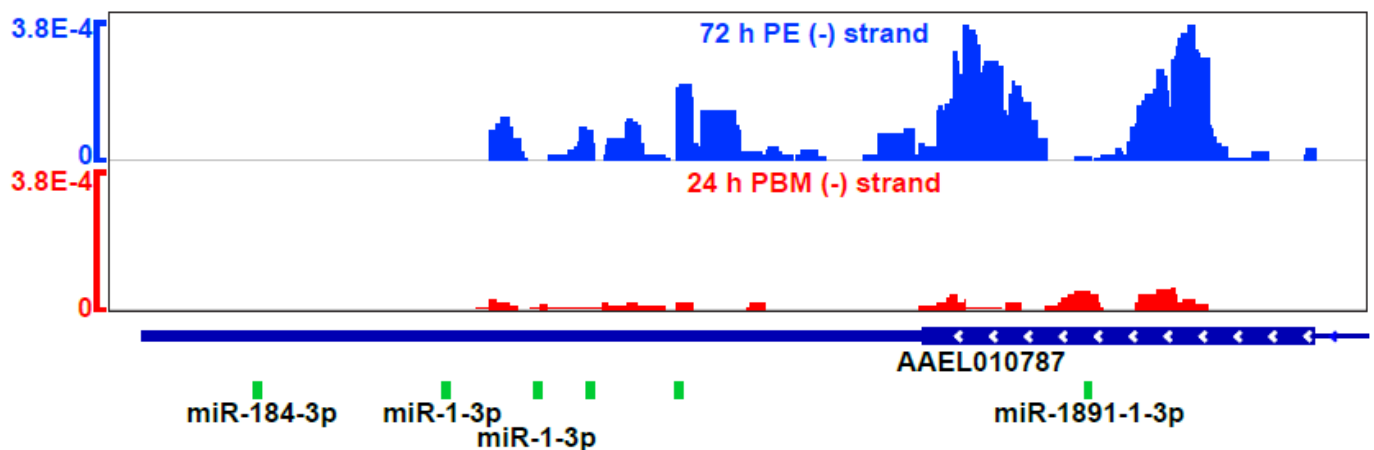

**Fig. S4.** Example of non-distinct 3' UTR peaks of AAEL010787.

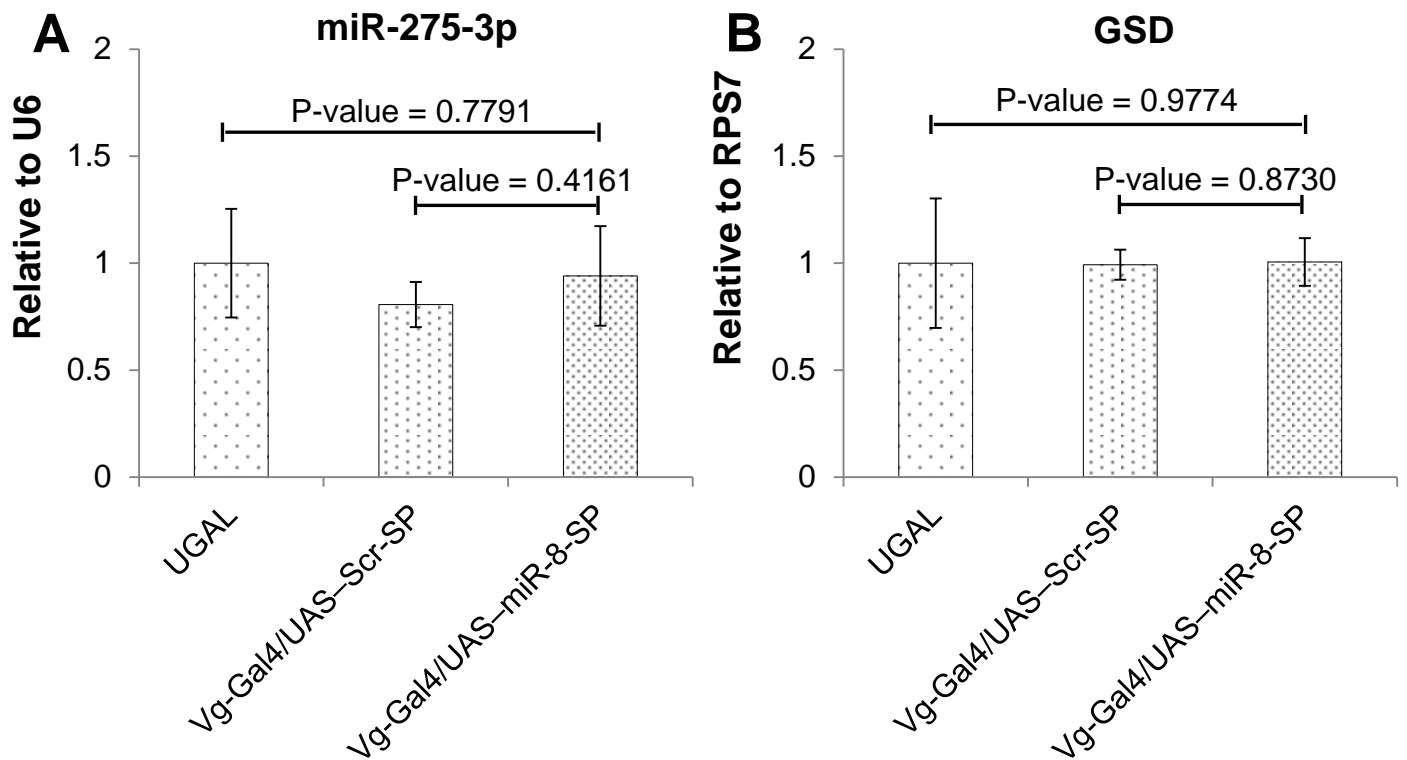

**Fig. S5.** Quantitative PCR examination of miR-275-3p (A) and GSD (B) in UGAL, Vg-Gal4/UAS-Scr-SP and Vg-Gal4/UAS-miR-8-SP. Expression levels were normalized to that of U6 for miR-275-3p and that of RPS7 for GSD. Three independent biological replicates were performed. Average of relative expression was taken as 1 from UGAL wild type mosquitoes. Statistical significance was calculated using unpaired t-tests, and expression levels were represented as mean $\pm$ SD. GSD, AAEL006834, glutamate semialdehyde dehydrogenase.

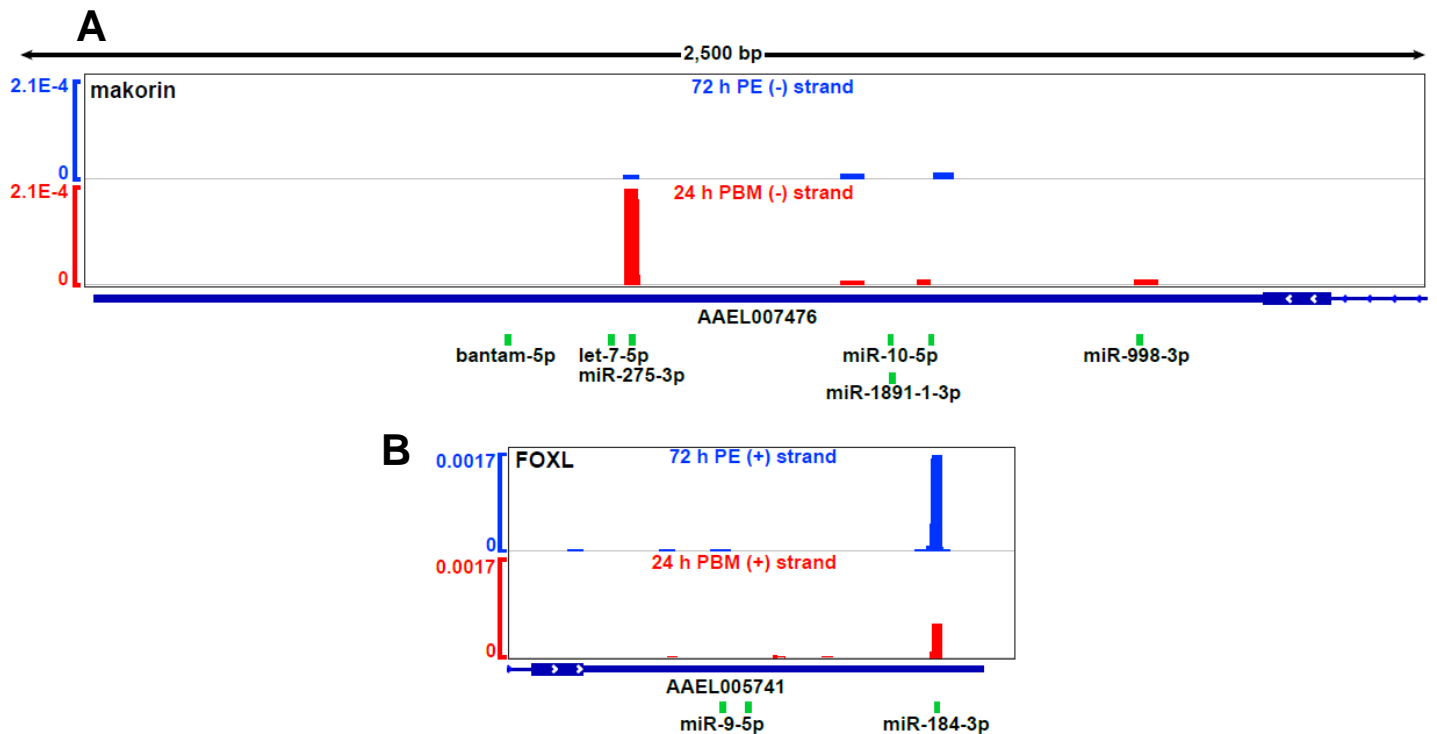

**Fig. S6.** IGV illustrations of AGO1 CLIP-seq 3' UTR signals for AAEL007476 ((A), makorin) and AAEL005741 ((B), FOXL).

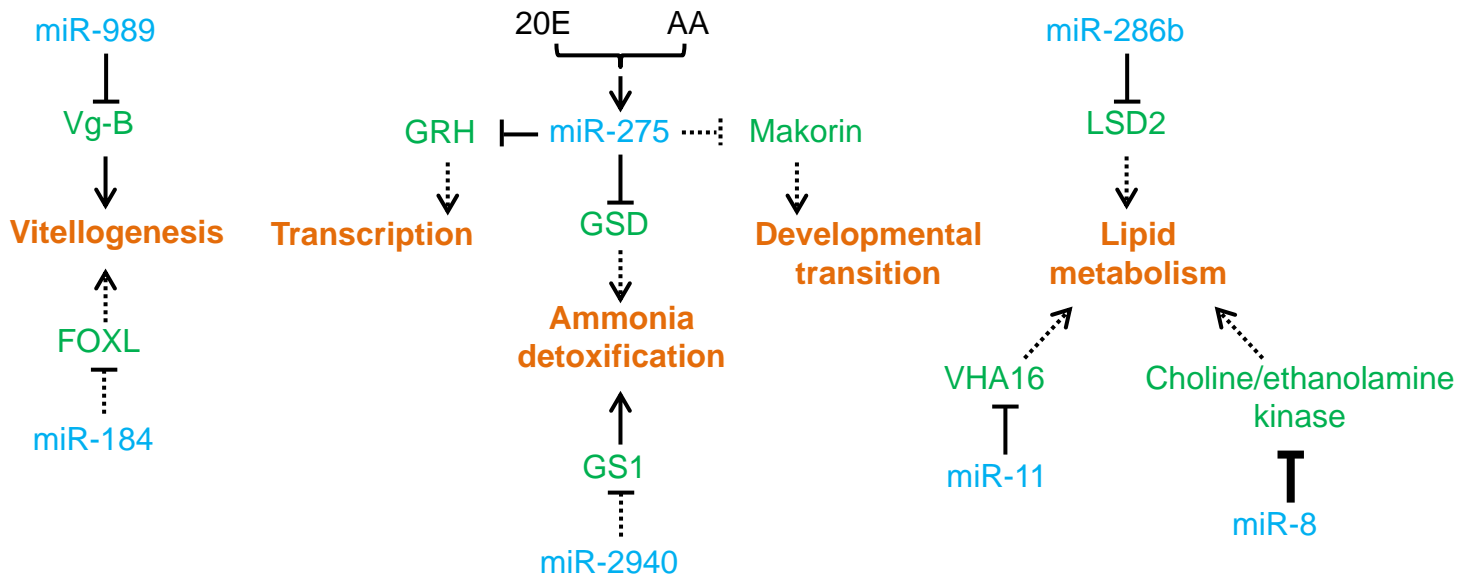

**Fig. S7.** A proposed miRNA regulatory network in multiple physiological processes in the fat body during the vitellogenic period. Validated miRNA-mRNA interactions from CLIP-seq analyses and the luciferase assay (Fig. 4), as well as previously demonstrated links to physiological processes, are marked with solid lines, while target interactions validated by CLIP-seq only, and proposed connections to physiology, are indicated by dashed lines. The miR-8 - Choline/ethanolamine kinase interaction, validated in CLIP-seq analyses, the luciferase assay and *in vivo* transgenic miR-8 sponge technique, is indicated by a bold solid line. Gene list: Vg-B, AAEL006138, Vitellogenin isoform B; FOXL, AAEL005741, Forkhead-box transcription factor L; GRH, AAEL000577, DNA binding protein elf-1, orthologue of *D. melanogaster* grainy head; GSD, AAEL006834, glutamate semialdehyde dehydrogenase; GS1, AAEL001887, glutamine synthetase 1; Makorin, AAEL007476; LSD2, AAEL006820, lipid storage droplets surface binding protein 2; VHA16, AAEL000291, V-type proton ATPase 16-kDa proteolipid subunit; choline/ethanolamine kinase, AAEL008853.

**Table S1. Mapping statistics of small RNA libraries**

| Sample        | Number of reads | Number of genome aligned | Percentage of aligned reads |
|---------------|-----------------|--------------------------|-----------------------------|
| 72 h PE rep1  | 23766505        | 23284580                 | 97.97%                      |
| 72 h PE rep2  | 24942979        | 24297250                 | 97.41%                      |
| 72 h PE rep3  | 20776502        | 20289771                 | 97.66%                      |
| 6 h PBM rep1  | 14604621        | 13616527                 | 93.23%                      |
| 6 h PBM rep2  | 21410522        | 20820661                 | 97.24%                      |
| 6 h PBM rep3  | 16406287        | 15168215                 | 92.45%                      |
| 24 h PBM rep1 | 17559341        | 17017053                 | 96.91%                      |
| 24 h PBM rep2 | 22789102        | 22013117                 | 96.59%                      |
| 24 h PBM rep3 | 13390993        | 12887694                 | 96.24%                      |
| 36 h PBM rep1 | 8857422         | 8558678                  | 96.63%                      |
| 36 h PBM rep2 | 22896024        | 22284705                 | 97.33%                      |
| 36 h PBM rep3 | 19140626        | 18666414                 | 97.52%                      |
| 48 h PBM rep1 | 15840623        | 15385978                 | 97.13%                      |
| 48 h PBM rep2 | 30654177        | 29670297                 | 96.79%                      |
| 48 h PBM rep3 | 26209301        | 25603175                 | 97.69%                      |
| Total         | 299245025       | 289564115                | 96.76%                      |

**Table S2. miRNA expression profiles in seven clades of unsupervised hierarchical clustering (Fig. 1B)\***

| Clade | miRNA ID     | 72 h PE | PBM     |         |         |         | Expression pattern |
|-------|--------------|---------|---------|---------|---------|---------|--------------------|
|       |              |         | 6 h     | 24 h    | 36 h    | 48 h    |                    |
| V     | miR-184      | 22551.6 | 18142   | 13212.9 | 16932.5 | 19812   | 72 h PE peak       |
| V     | miR-11-3p    | 7341.5  | 8072    | 7341.2  | 6408.1  | 5221.1  | 72 h PE peak       |
| V     | miR-100      | 2972.9  | 2155.1  | 3281.3  | 1785.8  | 1747.6  | 72 h PE peak       |
| V     | miR-306-5p   | 2051.6  | 2115.3  | 1943.3  | 1785.3  | 1594    | 72 h PE peak       |
| V     | miR-9c-5p    | 1599.8  | 1591.1  | 1092.7  | 1080.5  | 948.3   | 72 h PE peak       |
| V     | miR-11-5p    | 1345.7  | 1287.2  | 840.3   | 967.9   | 1111.9  | 72 h PE peak       |
| V     | miR-125-5p   | 556.7   | 443.1   | 466.8   | 446.4   | 434.6   | 72 h PE peak       |
| V     | miR-998      | 187.2   | 188.4   | 181.8   | 105.6   | 86.1    | 72 h PE peak       |
| V     | miR-9b       | 157.7   | 177.3   | 141.2   | 99.4    | 102.8   | 72 h PE peak       |
| V     | miR-308-5p   | 115.3   | 118.8   | 87.5    | 74.3    | 98.9    | 72 h PE peak       |
| V     | miR-988-3p   | 108.8   | 103.3   | 63.2    | 53.1    | 67.3    | 72 h PE peak       |
| V     | miR-9c-3p    | 87.9    | 88.5    | 69.3    | 59.7    | 52.2    | 72 h PE peak       |
| V     | miR-iab-4-5p | 37.4    | 35.8    | 24.9    | 33.8    | 33.9    | 72 h PE peak       |
| V     | miR-306-3p   | 8.7     | 6       | 3.1     | 3.2     | 9.3     | 72 h PE peak       |
| V     | miR-988-5p   | 2.4     | 2.5     | 1.9     | 1.6     | 2.2     | 72 h PE peak       |
| VII   | bantam-3p    | 15059.9 | 17800.6 | 15626.8 | 14006.6 | 14306.3 | 6 h PBM peak       |
| VII   | let-7        | 1272    | 1394.3  | 1261.7  | 1277.3  | 1273.9  | 6 h PBM peak       |
| VII   | miR-252-5p   | 875.2   | 1113.3  | 963.4   | 651.9   | 1019.8  | 6 h PBM peak       |
| VII   | miR-278-5p   | 118.4   | 278.5   | 58.1    | 60      | 131     | 6 h PBM peak       |
| VII   | miR-92a-3p   | 10.3    | 176.9   | 10.6    | 9.2     | 19.7    | 6 h PBM peak       |
| VII   | miR-252-3p   | 10.6    | 14.6    | 10.5    | 8.2     | 9.8     | 6 h PBM peak       |

|     |              |        |          |          |          |         |               |
|-----|--------------|--------|----------|----------|----------|---------|---------------|
| VII | miR-79-3p    | 5.4    | 7.4      | 6.9      | 3.8      | 4.3     | 6 h PBM peak  |
| I   | miR-8-3p     | 123223 | 127328.5 | 130780.2 | 119923.3 | 109098  | 24 h PBM peak |
| I   | miR-276-3p   | 4794.8 | 5589.9   | 8010.8   | 7522.3   | 6857.2  | 24 h PBM peak |
| I   | miR-275-3p   | 1397.5 | 3306.9   | 6617     | 4219.6   | 3513.4  | 24 h PBM peak |
| I   | miR-263a-5p  | 1572.3 | 1154.6   | 3519.2   | 3283.9   | 2592.2  | 24 h PBM peak |
| I   | miR-279      | 1495.5 | 1755.7   | 1927.2   | 1459.2   | 1136.6  | 24 h PBM peak |
| I   | miR-34-5p    | 638.2  | 937.3    | 1531.1   | 659.4    | 1168    | 24 h PBM peak |
| I   | miR-305-5p   | 400.9  | 852.5    | 1270     | 1030.8   | 770.2   | 24 h PBM peak |
| I   | miR-996      | 575.6  | 685.8    | 695.2    | 632.7    | 549.8   | 24 h PBM peak |
| I   | miR-999      | 352.6  | 386      | 409      | 390.3    | 342     | 24 h PBM peak |
| I   | miR-989      | 184.6  | 0.5      | 622.4    | 54.3     | 223.4   | 24 h PBM peak |
| I   | miR-305-3p   | 23.5   | 252.8    | 307.8    | 73.1     | 64.6    | 24 h PBM peak |
| I   | miR-1        | 64.5   | 139.8    | 233.4    | 87.3     | 151.2   | 24 h PBM peak |
| I   | miR-263a-3p  | 30.7   | 32.3     | 115.7    | 67       | 69.8    | 24 h PBM peak |
| I   | miR-275-5p   | 5.9    | 130.9    | 124.9    | 8.8      | 8.9     | 24 h PBM peak |
| I   | miR-276-5p   | 25.2   | 46.3     | 74.9     | 53.2     | 38.7    | 24 h PBM peak |
| I   | miR-980-3p   | 26.5   | 34.8     | 42.1     | 38.5     | 27      | 24 h PBM peak |
| I   | miR-308-3p   | 25.6   | 45.7     | 37.2     | 30.3     | 19.1    | 24 h PBM peak |
| I   | miR-33       | 19.5   | 29.3     | 41.9     | 37.9     | 16.3    | 24 h PBM peak |
| I   | miR-282-5p   | 13.2   | 13.6     | 14.1     | 13.5     | 12.8    | 24 h PBM peak |
| II  | miR-317      | 4305.5 | 3292.2   | 5389.7   | 15057.4  | 7871.8  | 36 h PBM peak |
| II  | miR-970      | 455.4  | 556.8    | 511.3    | 564.6    | 418.4   | 36 h PBM peak |
| II  | miR-286b     | 2.8    | 0.6      | 166.3    | 1017.5   | 281.3   | 36 h PBM peak |
| II  | miR-2945-3p  | 204.6  | 215.7    | 216.1    | 241.3    | 188.8   | 36 h PBM peak |
| II  | miR-1889-5p  | 26.8   | 40.7     | 86.3     | 176.4    | 62.5    | 36 h PBM peak |
| II  | miR-1890     | 43.9   | 46.3     | 35       | 53.9     | 47.3    | 36 h PBM peak |
| II  | miR-2944b-5p | 0.1    | 0.1      | 8.2      | 80.6     | 34.4    | 36 h PBM peak |
| II  | miR-2a-5p    | 6.4    | 6        | 8.3      | 11.4     | 7.7     | 36 h PBM peak |
| II  | miR-2944b-3p | 0.7    | 0.5      | 1        | 11.2     | 3.3     | 36 h PBM peak |
| II  | miR-993      | 2.5    | 2.8      | 1.9      | 4.4      | 3.4     | 36 h PBM peak |
| IV  | miR-2940-3p  | 4955.1 | 5543.5   | 5160.4   | 7166     | 8106.1  | 48 h PBM peak |
| IV  | miR-281-5p   | 3107   | 3284.9   | 1870.6   | 3628.6   | 18603.1 | 48 h PBM peak |
| IV  | miR-10       | 1395.1 | 1100.5   | 1106.8   | 1210.5   | 1721.5  | 48 h PBM peak |
| IV  | miR-277-3p   | 785.4  | 656      | 844.8    | 1018.1   | 982.8   | 48 h PBM peak |
| IV  | miR-2941     | 68.8   | 1.2      | 581.4    | 1100.5   | 1622.9  | 48 h PBM peak |
| IV  | miR-2c       | 538.9  | 565.3    | 520.4    | 558.7    | 670.1   | 48 h PBM peak |
| IV  | miR-2a-3p    | 534.1  | 553.4    | 508.2    | 579.9    | 677.2   | 48 h PBM peak |
| IV  | miR-2b       | 538.2  | 563.9    | 518.4    | 558      | 669     | 48 h PBM peak |
| IV  | miR-71-3p    | 434.2  | 412.3    | 430.1    | 828      | 702.3   | 48 h PBM peak |
| IV  | miR-9a       | 289.3  | 323.4    | 317.1    | 316.4    | 364     | 48 h PBM peak |
| IV  | miR-34-3p    | 228.6  | 152.3    | 176.8    | 209      | 308.3   | 48 h PBM peak |
| IV  | miR-278-3p   | 144.5  | 145.9    | 182.1    | 193.9    | 185.8   | 48 h PBM peak |
| IV  | miR-92b-3p   | 145.3  | 76.3     | 115.7    | 141.6    | 265.4   | 48 h PBM peak |
| IV  | miR-309a     | 0.7    | 0.3      | 28.5     | 327.6    | 256.8   | 48 h PBM peak |
| IV  | miR-375      | 23.8   | 16.1     | 44       | 272.6    | 256.5   | 48 h PBM peak |
| IV  | miR-316      | 89.8   | 88.5     | 96       | 119.6    | 167.3   | 48 h PBM peak |
| IV  | miR-283      | 60.5   | 68.9     | 133.2    | 118.1    | 145.9   | 48 h PBM peak |

|     |             |        |        |        |        |        |               |
|-----|-------------|--------|--------|--------|--------|--------|---------------|
| IV  | miR-2946    | 13.5   | 0.3    | 80.7   | 157.3  | 236.9  | 48 h PBM peak |
| IV  | miR-309b-3p | 0.5    | 0.3    | 24.4   | 259.9  | 197.1  | 48 h PBM peak |
| IV  | miR-957     | 43.6   | 40.4   | 35.8   | 63.8   | 79.5   | 48 h PBM peak |
| IV  | miR-133     | 33.3   | 35.6   | 31.5   | 65.5   | 70.8   | 48 h PBM peak |
| IV  | miR-87      | 34.5   | 34.2   | 34.3   | 41.1   | 60.5   | 48 h PBM peak |
| IV  | miR-281-3p  | 14     | 16     | 11.3   | 19.5   | 84.2   | 48 h PBM peak |
| IV  | miR-981     | 12.5   | 12.7   | 11     | 16.2   | 16     | 48 h PBM peak |
| IV  | miR-263b-5p | 13     | 11.8   | 11.2   | 14.7   | 14.8   | 48 h PBM peak |
| IV  | miR-137     | 10.7   | 9.6    | 11.9   | 11.3   | 13.3   | 48 h PBM peak |
| IV  | miR-307     | 4.7    | 4.7    | 5      | 6.5    | 8.3    | 48 h PBM peak |
| IV  | miR-13-5p   | 3.7    | 4.2    | 5.6    | 6.4    | 6.3    | 48 h PBM peak |
| IV  | miR-1000    | 3.1    | 3.4    | 3.2    | 7.9    | 6.6    | 48 h PBM peak |
| IV  | miR-210     | 2      | 3.1    | 1.9    | 2.8    | 5.9    | 48 h PBM peak |
| IV  | miR-929     | 2.1    | 2.2    | 1.8    | 2.9    | 3.3    | 48 h PBM peak |
| IV  | miR-927     | 2      | 1.5    | 1.6    | 2.4    | 3.4    | 48 h PBM peak |
| III | miR-14      | 6355.9 | 7176   | 6398.4 | 6854.7 | 7196   |               |
| III | miR-8-5p    | 2336.8 | 4777   | 3555.8 | 4902.8 | 4910.4 |               |
| III | miR-12-5p   | 411.8  | 582    | 512.4  | 728.2  | 720.6  |               |
| III | miR-2940-5p | 66.1   | 139.8  | 120.2  | 141.7  | 175    |               |
| III | miR-13-3p   | 82.1   | 109.9  | 89.8   | 104.5  | 99.9   |               |
| III | miR-190     | 40.3   | 50.9   | 37     | 49.5   | 48.6   |               |
| III | miR-315-5p  | 9.6    | 13.2   | 11.8   | 17.4   | 15.2   |               |
| VI  | bantam-5p   | 1070.2 | 1102.6 | 1141.4 | 991.7  | 1401.6 |               |
| VI  | miR-31      | 169    | 187.6  | 162.7  | 155.9  | 203    |               |
| VI  | miR-1891    | 60.8   | 70     | 84.3   | 54.3   | 89.2   |               |
| VI  | miR-1174    | 1.3    | 103.2  | 16.3   | 9.9    | 119.3  |               |
| VI  | miR-71-5p   | 11.6   | 23.8   | 27.3   | 15.3   | 21.3   |               |
| VI  | miR-12-3p   | 12.5   | 23.2   | 14.2   | 15.4   | 20.1   |               |
| VI  | miR-1175-3p | 0.5    | 20.3   | 4.2    | 2.6    | 33.9   |               |
| VI  | miR-1175-5p | 0.2    | 13.9   | 2.3    | 1.1    | 26.3   |               |
| VI  | miR-7       | 2.3    | 9.4    | 7.7    | 3.5    | 7.9    |               |
| VI  | miR-1889-3p | 3.2    | 5.2    | 3.3    | 3.4    | 5      |               |

\*Abundance is represented by averages of normalized values from three biological replicates.

**Table S3. Mapping statistics of AGO1 CLIP-seq libraries**

|                               | 72 h PE  |          |          | 24 h PBM |          |          |
|-------------------------------|----------|----------|----------|----------|----------|----------|
|                               | rep1     | rep2     | rep3     | rep1     | rep2     | rep3     |
| Initial reads                 | 21903299 | 30358134 | 14017387 | 49991023 | 27871705 | 13223180 |
| Reads >15nt post adaptor trim | 14264580 | 20304524 | 9361612  | 33420720 | 17777337 | 9829347  |
| Bowtie2 stats                 |          |          |          |          |          |          |
| aligned 0 time                | 6938446  | 8741320  | 3294900  | 18274983 | 8476858  | 2952817  |
| aligned exactly 1 time        | 1212214  | 1920106  | 927267   | 1985002  | 1884686  | 1720546  |
| aligned >1 times              | 6113920  | 9643098  | 5139445  | 13160735 | 7415793  | 5155984  |
| Overall alignment rate        | 51.36%   | 56.95%   | 64.80%   | 45.32%   | 52.32%   | 69.96%   |



**Table S4. Total lengths of 5' UTR, CDS and 3' UTR in AegL3.3 gene set**

| AegL 3.3 annotations |                        |            |
|----------------------|------------------------|------------|
|                      | Estimated lengths (nt) | Percentage |
| 5' UTR               | 2,790,392              | 8.71%      |
| CDS                  | 24,176,559             | 75.46%     |
| 3' UTR               | 5,070,301              | 15.83%     |
| Total                | 32,037,252             | 100%       |

**Table S5. The five miRNA families with most identified targets**

| miRNA family                                    | Number of targets in Dataset S4 | miRNA abundance rank |                   |
|-------------------------------------------------|---------------------------------|----------------------|-------------------|
|                                                 |                                 | 72 h PE + 24 h PBM   | full time course  |
| miR-279, miR-286b, miR-2945-3p, miR-996         | 13                              | 15 <sup>th*</sup>    | 15 <sup>th*</sup> |
| miR-11-3p, miR-13-3p, miR-2a-3p, miR-2b, miR-2c | 11                              | 4 <sup>th**</sup>    | 5 <sup>th**</sup> |
| miR-14                                          | 11                              | 6 <sup>th</sup>      | 6 <sup>th</sup>   |
| miR-316                                         | 11                              | 49 <sup>th</sup>     | 51 <sup>st</sup>  |
| miR-8-3p                                        | 8                               | 1 <sup>st</sup>      | 1 <sup>st</sup>   |

\* , ranking of most abundant miRNA individual of the family, miR-279

\*\* , ranking of most abundant miRNA individual of the family, miR-11-3p

**Table S6. Significantly enriched GO terms (P-value < 0.05) in ontology of biological process for 140 3' UTR peaks harboring 7mer miRNA seeds**

| GO ID      | Gene Count | GO term                                          |
|------------|------------|--------------------------------------------------|
| GO:0046394 | 5          | carboxylic acid biosynthetic process             |
| GO:0016053 | 5          | organic acid biosynthetic process                |
| GO:0044711 | 13         | single-organism biosynthetic process             |
| GO:0008652 | 4          | cellular amino acid biosynthetic process         |
| GO:1901607 | 4          | alpha-amino acid biosynthetic process            |
| GO:0044283 | 6          | small molecule biosynthetic process              |
| GO:0044699 | 35         | single-organism process                          |
| GO:0009064 | 3          | glutamine family amino acid metabolic process    |
| GO:0009084 | 3          | glutamine family amino acid biosynthetic process |
| GO:0006650 | 3          | glycerophospholipid metabolic process            |
| GO:0046486 | 3          | glycerolipid metabolic process                   |
| GO:0044763 | 27         | single-organism cellular process                 |
| GO:0009108 | 4          | coenzyme biosynthetic process                    |
| GO:0051188 | 4          | cofactor biosynthetic process                    |
| GO:0044765 | 13         | single-organism transport                        |

**Table S7. Summary of miRNAs interacting with specific COG functional groups**

| Functional category                | Functional group                                                  | Interacting miRNAs*                                                                             |
|------------------------------------|-------------------------------------------------------------------|-------------------------------------------------------------------------------------------------|
| Information storage and processing | [K] Transcription                                                 | bantam-5p, miR-14, miR-184, miR-275-3p, miR-286b                                                |
| Cellular processes and signaling   | [T] Signal transduction mechanisms                                | miR-11-3p, miR-286b, miR-305-5p, miR-316                                                        |
|                                    | [U] Intracellular trafficking, secretion, and vesicular transport | miR-9c-3p, miR-11-3p, miR-252-5p, miR-286b, miR-1889-5p, miR-2940-3p                            |
|                                    | [O] Posttranslational modification, protein turnover, chaperones  | miR-8-3p, miR-14, miR-71-3p, miR-275-3p, miR-286b, miR-316, miR-317, miR-2940-5p                |
| Metabolism                         | [C] Energy production and conversion                              | miR-8-5p, miR-11-3p, miR-277-3p, miR-317                                                        |
|                                    | [I] Lipid transport and metabolism                                | bantam-3p, miR-8-3p, miR-71-3p, miR-252-5p, miR-277-3p, miR-283, miR-286b, miR-316, miR-2940-3p |
|                                    | [E] Amino acid transport and metabolism                           | miR-31, miR-263a-5p, miR-275-3p, miR-316, miR-2940-5p                                           |
|                                    | [F] Nucleotide transport and metabolism                           | miR-8-5p, miR-275-3p, miR-316, miR-317                                                          |
|                                    | [P] Inorganic ion transport and metabolism                        | bantam-5p, miR-14, miR-71-3p, miR-252-5p, miR-998, miR-1889-5p                                  |
|                                    | [H] Coenzyme transport and metabolism                             | miR-14, miR-31, miR-316                                                                         |
|                                    | [G] Carbohydrate transport and metabolism                         | miR-286b                                                                                        |
|                                    | [Q] Secondary metabolites biosynthesis, transport and catabolism  | miR-31                                                                                          |

\*One miRNA name is listed to represent a unique 7mer seed family. miR-11-3p represents the seed family of miR-11-3p, miR-13-3p, miR-2a-3p, miR-2b and miR-2c. Similarly, miR-286b is listed as that of miR-279, miR-286b, miR-2945-3p and miR-996, while miR-275-3p is for miR-275-3p and miR-306-5p.

## Supplementary datasets

**Dataset S1.** Raw and normalized expression value (RPM) for 124 *Ae. aegypti* mature miRNAs in miRBase v21 from three biological replicates of small RNA libraries.

**Dataset S2.** miRDeep2 output of candidate loci for new miRNAs from fifteen small RNA libraries.

**Dataset S3.** Peak calling output from three biological replicates of *Ae. aegypti* fat body AGO1 CLIP-seq libraries at 72 h PE and 24 h PBM.

**Dataset S4.** DESeq2 output of 3' UTR peaks containing miRNA 7mer complementary sites, normalized by mRNA transcript abundance. Functional groups and categories were assigned based on EggNOG database v4.5 for 140 3' UTR peaks harboring 7mer miRNA seeds.

**Dataset S5.** DNA/RNA oligo sequences.
